# Supplementary material for: DOCK1 Regulates Growth and Motility through the RRP1B-Claudin-1 Pathway in Claudin-Low Breast Cancer Cells
Source: PubMed Central journal article supplement (PMC6896004; doi:10.3390/cancers11111762), 2019-11-08
Supplement: cancers-11-01762-s001.pdf [file cancers-11-01762-s001.pdf]

## Supplementary Materials and Methods

Table S1. Antibody information in this study

| Antibodies                                                                          | Catalog No., Company             | Analyses (dilution ratio)                                                                            |
|-------------------------------------------------------------------------------------|----------------------------------|------------------------------------------------------------------------------------------------------|
| 5-Methylcytosine (5-mC)                                                             | #28692, Cell Signaling Tech.     | Immunofluorescence (1: 500)                                                                          |
| $\alpha$ -Catenin                                                                   | #3240, Cell Signaling Tech.      | Western Blotting (1: 1000)                                                                           |
| $\beta$ -actin                                                                      | MAG1501; EMD Millipore           | Western Blotting (1: 10000)                                                                          |
| $\beta$ -Catenin                                                                    | #9582, Cell Signaling Tech.      | Western Blotting (1: 2000)                                                                           |
| Caspase-3                                                                           | #9662, Cell Signaling Tech.      | Western Blotting (1: 1000)                                                                           |
| Caspase-8                                                                           | #9746, Cell Signaling Tech.      | Western Blotting (1: 1000)                                                                           |
| Caspase-9                                                                           | #9502, Cell Signaling Tech.      | Western Blotting (1: 1000)                                                                           |
| c-Jun                                                                               | #9165, Cell Signaling Tech.      | Western Blotting (1: 1000)                                                                           |
| Claudin-1                                                                           | sc-137121, Santa Cruz Biotech.   | Western Blotting (1: 1000)<br>Immunofluorescence (1: 500)                                            |
| DNMT1                                                                               | #61618, BD Biosciences           | Western Blotting (1: 1000)                                                                           |
| DNMT3a                                                                              | sc-20703, Santa Cruz Biotech.    | Western Blotting (1: 1000)                                                                           |
| DNMT3b                                                                              | sc-81252, Santa Cruz Biotech.    | Western Blotting (1: 500)                                                                            |
| DOCK1                                                                               | #4846, Cell Signaling Tech.      | Western Blotting (1: 1000)                                                                           |
| E-Cadherin                                                                          | #3195, Cell Signaling Tech.      | Western Blotting (1: 1000)                                                                           |
| EZH2                                                                                | #612666, BD Biosciences          | Western Blotting (1: 1000)                                                                           |
| HA-Tag                                                                              | #3724, Cell Signaling Tech.      | Western Blotting (1: 3000)                                                                           |
| MEK1                                                                                | #8727, Cell Signaling Tech.      | Western Blotting (1: 1000)                                                                           |
| N-Cadherin                                                                          | #4061, Cell Signaling Tech.      | Western Blotting (1: 1000)                                                                           |
| PARP                                                                                | #9542, Cell Signaling Tech.      | Western Blotting (1: 1000)                                                                           |
| phospho-c-Jun                                                                       | #9164, Cell Signaling Tech.      | Western Blotting (1: 1000)                                                                           |
| RRP1A                                                                               | sc-398970, Santa Cruz Biotech.   | Western Blotting (1: 1000)                                                                           |
| RRP1B                                                                               | sc-398162, Santa Cruz Biotech.   | Western Blotting (1: 1000)<br>Immunofluorescence (1: 500)                                            |
| Slug                                                                                | #9585, Cell Signaling Tech.      | Western Blotting (1: 1000)                                                                           |
| Snail                                                                               | #3879, Cell Signaling Tech.      | Western Blotting (1: 1000)                                                                           |
| Twist1/2                                                                            | GTX127310, GeneTex               | Western Blotting (1: 1000)                                                                           |
| Vimentin                                                                            | #5714, Cell Signaling Tech.      | Western Blotting (1: 2000)                                                                           |
| ZEB1                                                                                | #3396, Cell Signaling Tech.      | Western Blotting (1: 1000)                                                                           |
| ZO-1                                                                                | #5406, Cell Signaling Tech.      | Western Blotting (1: 1000)                                                                           |
| Goat anti-Mouse IgG (H+L) Highly Cross-Adsorbed Secondary Antibody, Alexa Fluor 488 | A-11029, ThermoFisher Scientific | Immunofluorescence (1: 1000)<br>Assay: Intracellular location of RRP1B (Figure 8B)                   |
| Goat anti-mouse IgG (H+L) Highly Cross-Adsorbed Secondary Antibody, Alexa Fluor 594 | A-11032, ThermoFisher Scientific | Immunofluorescence (1: 1000)<br>Assay: Intracellular location of Claudin-1 (Figure 3B and Figure 5C) |
| Rabbit IgG (H+L) Highly Cross-Adsorbed Secondary Antibody, Alexa Fluor 488          | A-21206, ThermoFisher Scientific | Immunofluorescence (1: 1000)<br>Assay: 5-mC staining (Figure 7D)                                     |

Table S2. Primer information in qRT-PCR analysis.

| Gene (encoded protein)                                             | Gene Bank no. | Primer sequence                                                    |
|--------------------------------------------------------------------|---------------|--------------------------------------------------------------------|
| <i>ACTB</i> ( $\beta$ -actin)                                      | AY582799.1    | F: 5'-CCAACCGCGAGAAGATGA-3'<br>R: 5'-CCAGAGGCGTACAGGGATAG -3'      |
| <i>CLDN1</i> (claudin-1)                                           | NM_021101.4   | F: 5'-TTTACTCCTATGCCGGCGAC-3'<br>R: 5'-GAGGATGCCAACCACCATCA-3'     |
| <i>CLDN3</i> (claudin-3)                                           | NM_001306.3   | F: 5'-GGGACTTCTACAACCCCGTG-3'<br>R: 5'-CTTGGTGGCCGTGTACTTCT-3'     |
| <i>CLDN4</i> (claudin-4)                                           | NM_001305.4   | F: 5'- TCTCCTCTGTTCCGGGTAGG -3'<br>R: 5'- TCCCCTCTAAACCCGTCCAT -3' |
| <i>CLDN7</i> (claudin-7)                                           | NM_001307.5   | F: 5'-TCTTTATTGGCTGGGCAGGG-3'<br>R: 5'-ACCCAGCCTTGCTCTCATTC-3'     |
| <i>OLDN</i> (occludin)                                             | AH011257.2    | F: 5'-AAGGTTCCATCCGAAGCAGG-3'<br>R: 5'-GGGAGTGTAGGTGTGGGTG-3'      |
| <i>TJPI</i> (zonula occludens 1/ZO-1; tight junction protein/TJP1) | NM_003257.4   | F: 5'- CGGGAAGTTACGTGGCGAAG-3'<br>R: 5'- TCGGACAAAAGTCCGGGAAG-3'   |

Table S3. shRNA information in gene knockdown analysis.

| shRNA      | Target gene  | Gene ID | shRNA clone    |
|------------|--------------|---------|----------------|
| shCLDN1 #1 | <i>CLDN1</i> | 9076    | TRCN0000117333 |
| shCLDN1 #2 | <i>CLDN1</i> | 9076    | TRCN0000117334 |
| shDOCK1 #1 | <i>DOCK1</i> | 1793    | TRCN0000029074 |
| shDOCK1 #2 | <i>DOCK1</i> | 1793    | TRCN0000029076 |
| shJUN      | <i>JUN</i>   | 3725    | TRCN0000338165 |
| shLuc      |              |         | TRCN0000231740 |
| TRC1.Void  |              |         | ASN0000000002  |
| shRAC1     | <i>RAC1</i>  | 5879    | TRCN0000008430 |
| shRAC2     | <i>RAC2</i>  | 5880    | TRCN0000047274 |
| shRAC3     | <i>RAC3</i>  | 5881    | TRCN0000047290 |
| shRRP1B #1 | <i>RRP1B</i> | 23076   | TRCN0000131094 |
| shRRP1B #2 | <i>RRP1B</i> | 23076   | TRCN0000129332 |

Supplementary Figures

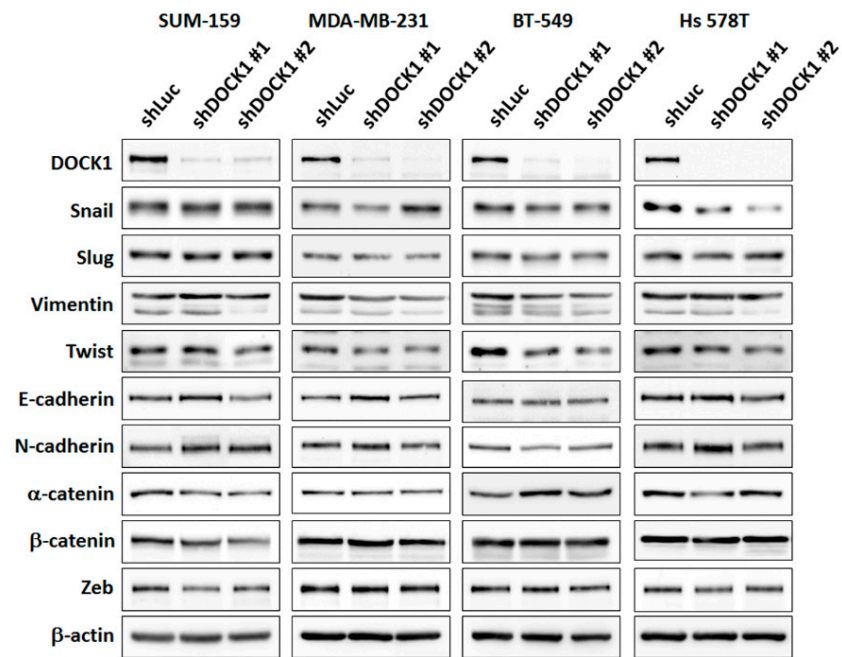

Figure S1. Effect of DOCK1 depletion on EMT-related protein expression. Claudin-low breast cancer cells were treated with shDOCK1 for 3 days. Cells were then harvested for protein abundance analysis by Western blot.

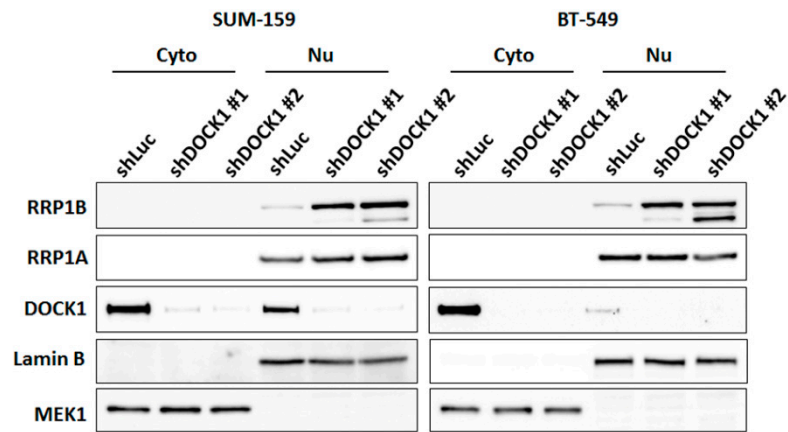

Figure S2. Knockdown of DOCK1 increases nuclear RRP1B levels. Claudin-low breast cancer cells were treated with shDOCK1 for 3 days. Cells were then harvested and fractionated into cytosolic and nuclear portions. Protein extracts from the fractions were used for protein determination Western blotting analysis. MEK1 and Lamin B served as a cytoplasmic (Cyto) and nuclear (Nu) control markers, respectively.

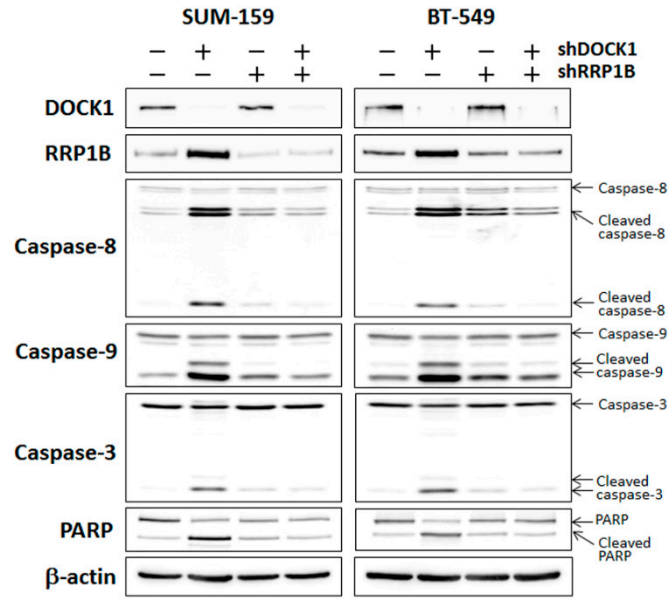

Figure S3. Knockdown of RRP1B attenuates caspase activation by DOCK1 depletion. Claudin-low breast cancer cells were treated with shDOCK1 and/or shRRP1B for 3 days. Cells were then harvested for protein abundance analysis by Western blot.

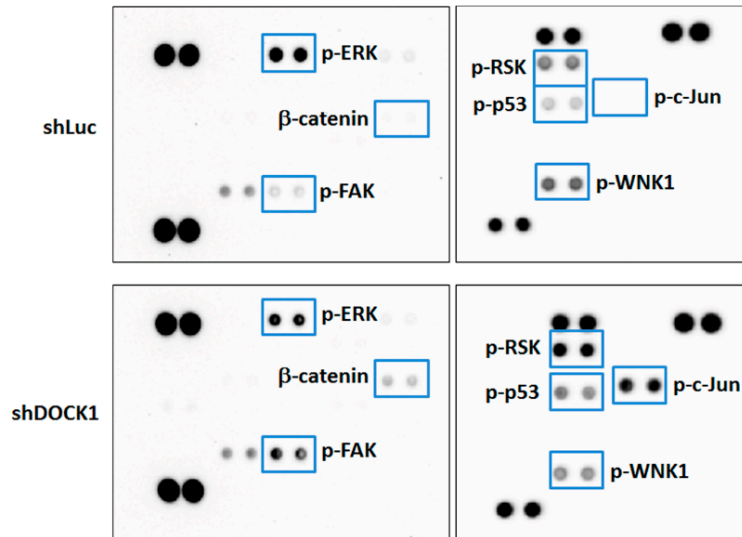

Figure S4. DOCK1 depletion alters the phosphorylation of specific protein kinases. MDA-MB-231 breast cancer cells were treated with shDOCK1 for 3 days. Cells were collected for protein phosphorylation analysis using a Human Phospho-Kinase Array (R&D Systems, Cat. #ARY003B).
